# Supplementary material for: Structural basis of inhibition of a transporter from Staphylococcus aureus, NorC, through a single-domain camelid antibody
Source: PubMed Central journal article supplement (PMC8257674; doi:10.1038/s42003-021-02357-x), 2021-07-05
Supplement: 42003_2021_2357_MOESM2_ESM.pdf [file 42003_2021_2357_MOESM2_ESM.pdf]

**Structural basis of inhibition of a transporter from  
*Staphylococcus aureus*, NorC, through a single-  
domain camelid antibody**

**Sushant Kumar, Arunabh Athreya, Ashutosh Gulati, Rahul Mony Nair, Ithayaraja Mahendran, Rakesh Ranjan and Aravind Penmatsa\***

Supplementary Information



NorC WT

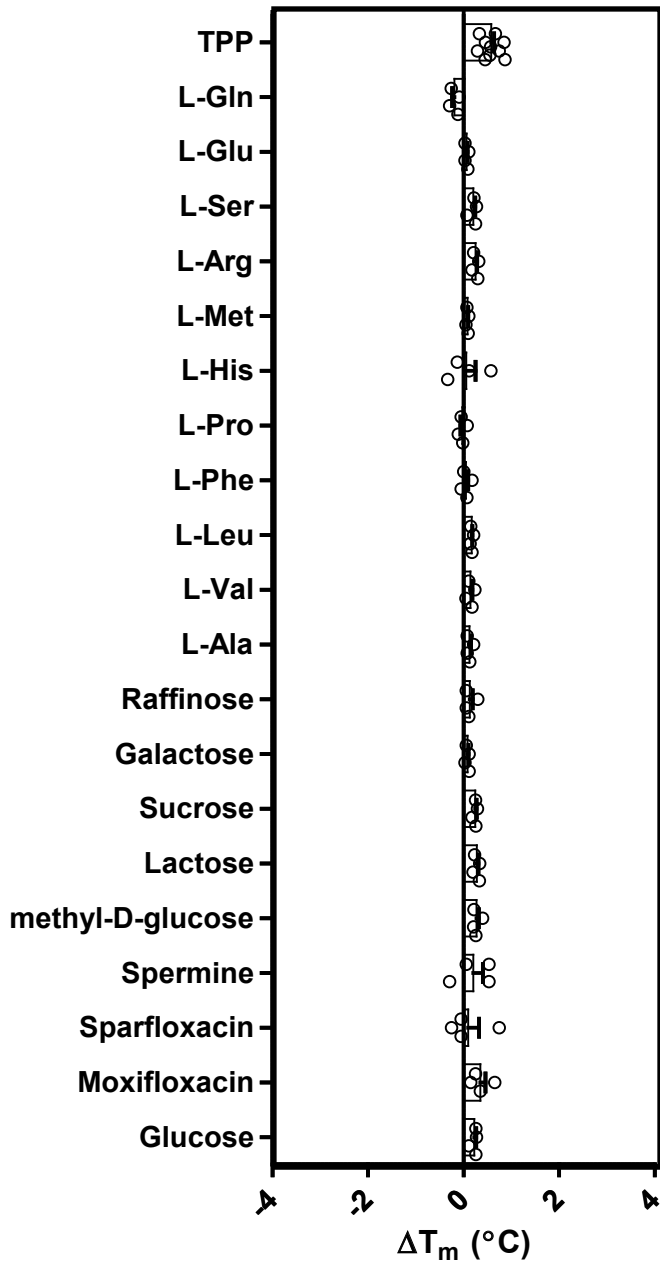

NorC K398A

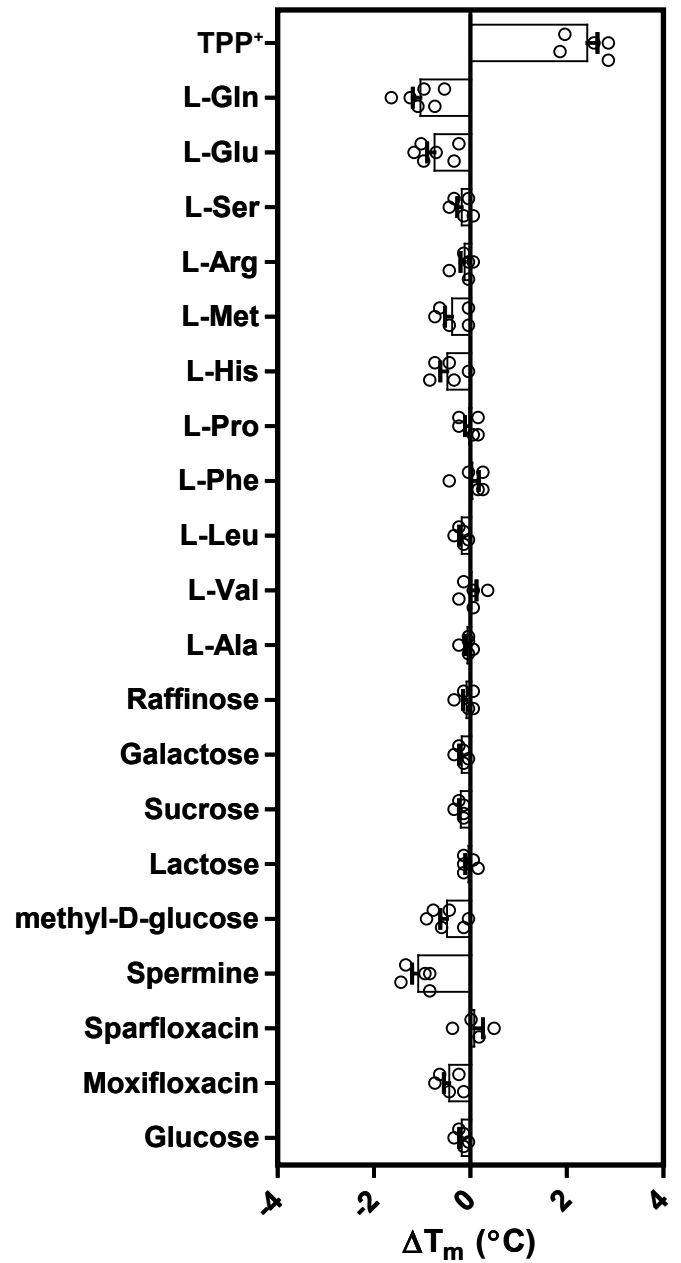

**Supplementary Figure S2** | DSF Screening of various compounds to find potential substrates of NorC.  $\Delta T_m$  were calculated by subtracting  $T_m$  calculated for apo-protein for each experiment.  $n > 4$  for every substrate tested. Error bars indicate standard error of mean. Source data are provided in the source data file.

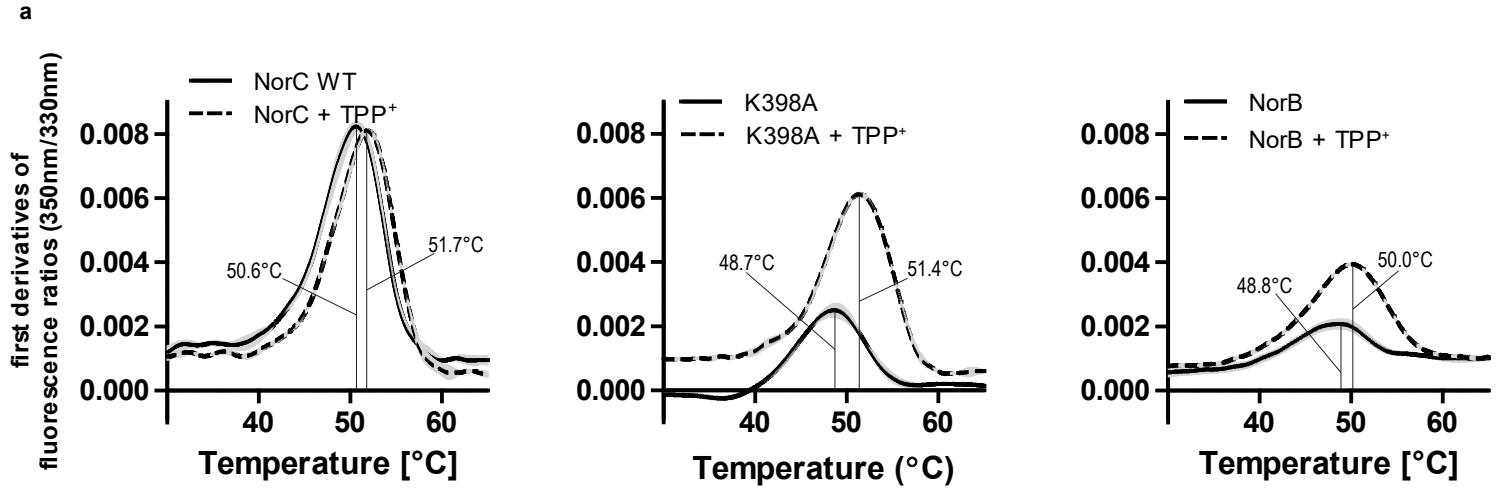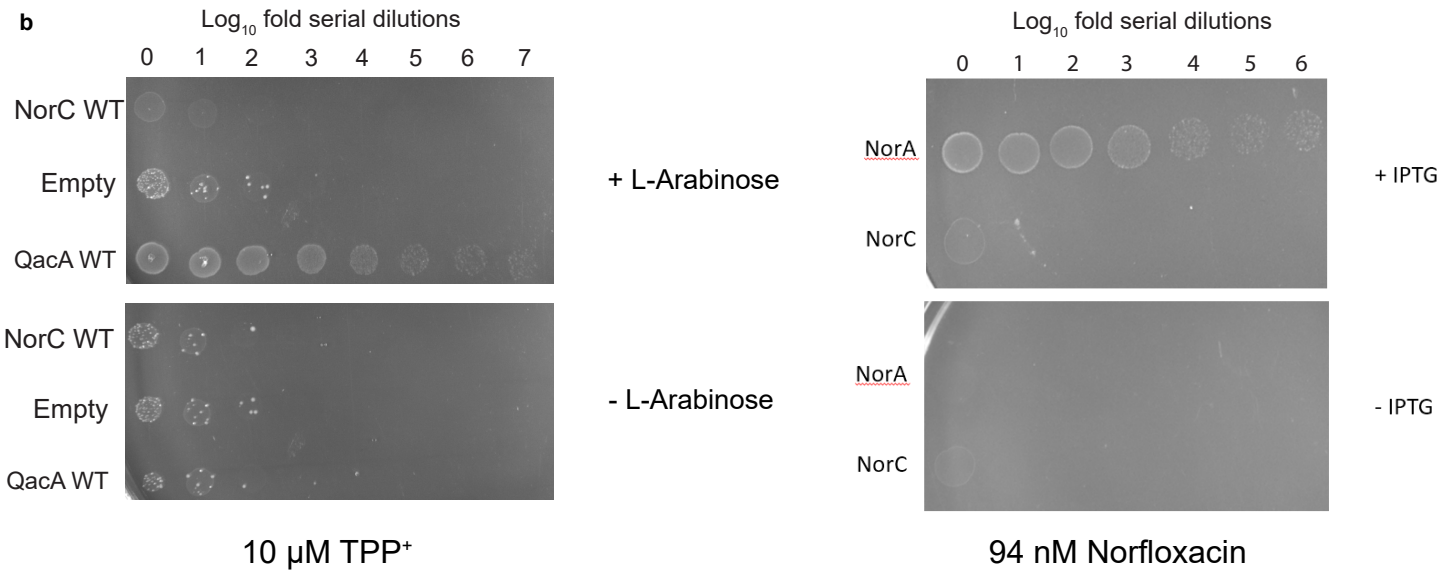

**Supplementary Figure S3 | a.** Differential scanning fluorimetric profiles of NorC WT, NorC K398A and NorB WT in the presence and absence of TPP<sup>+</sup>; error bars are shown as grey shadows (n=2 for technical replicates). **b.** Survival assays done in the presence of tetraphenylphosphonium (TPP<sup>+</sup>, using L-arabinose inducible pBAD24 expression vector) and norfloxacin (using IPTG inducible pET16b expression vector) at known MIC<sub>50</sub>; n=4 for independent replicates. Source data are provided in the source data file.

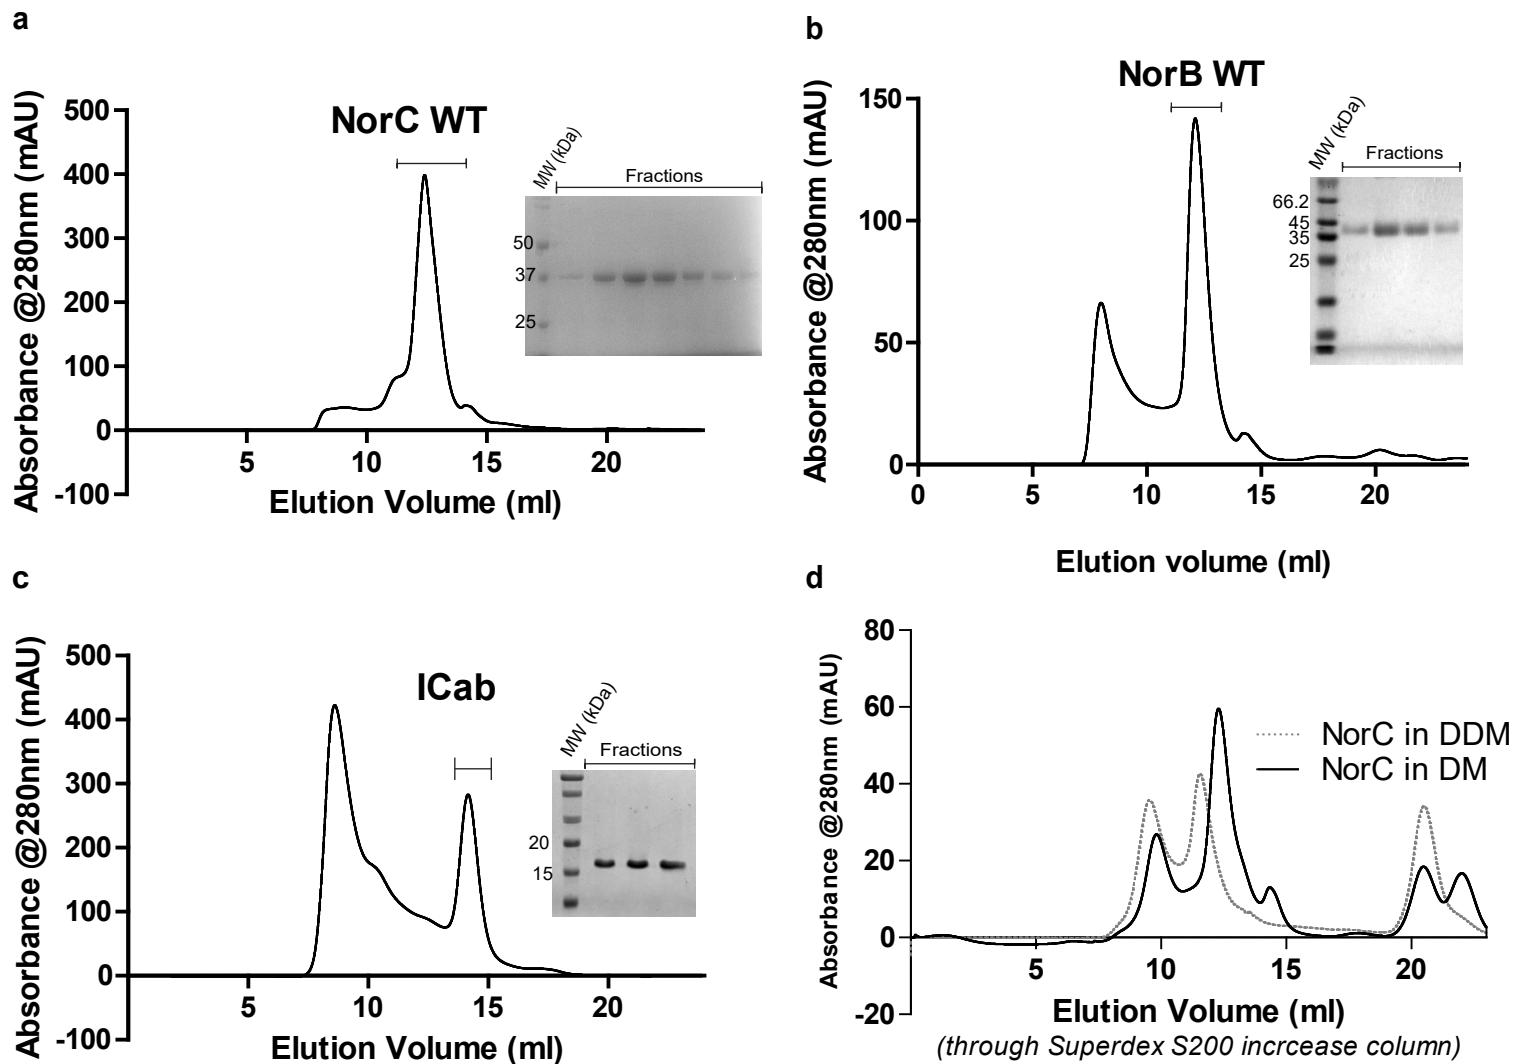

**Supplementary Figure S4** | Size exclusion chromatography profiles and SDS-PAGE (insets) with corresponding fractions of **a.** NorC WT, **b.** NorB WT and **c.** ICab. **d.** Comparison of NorC WT size exclusion chromatography profiles in 1mM DDM (n-dodecyl- $\beta$ -D-maltopyranoside, grey dotted trace) and in 4mM DM (n-decyl- $\beta$ -D-maltopyranoside, black trace). Source data are provided in the source data file.

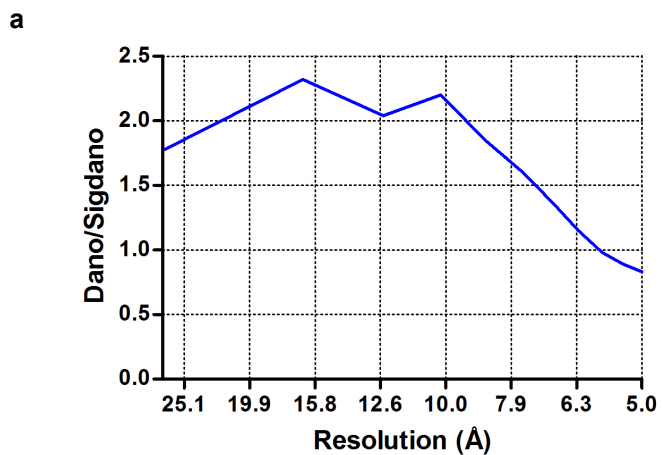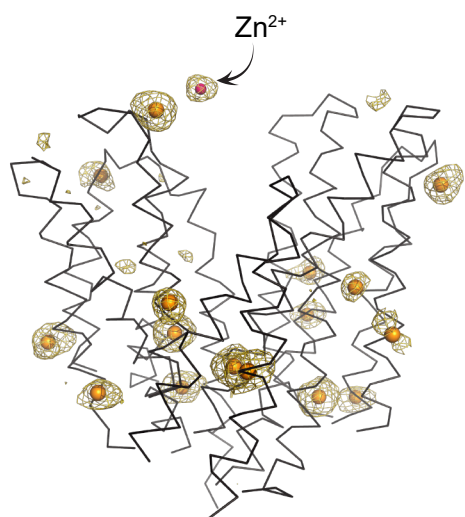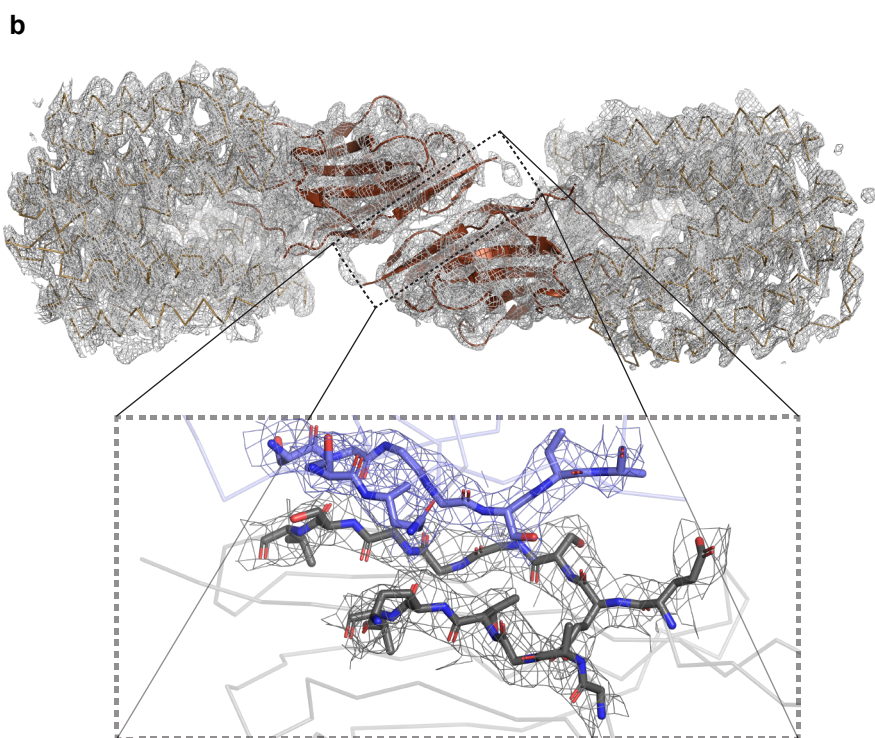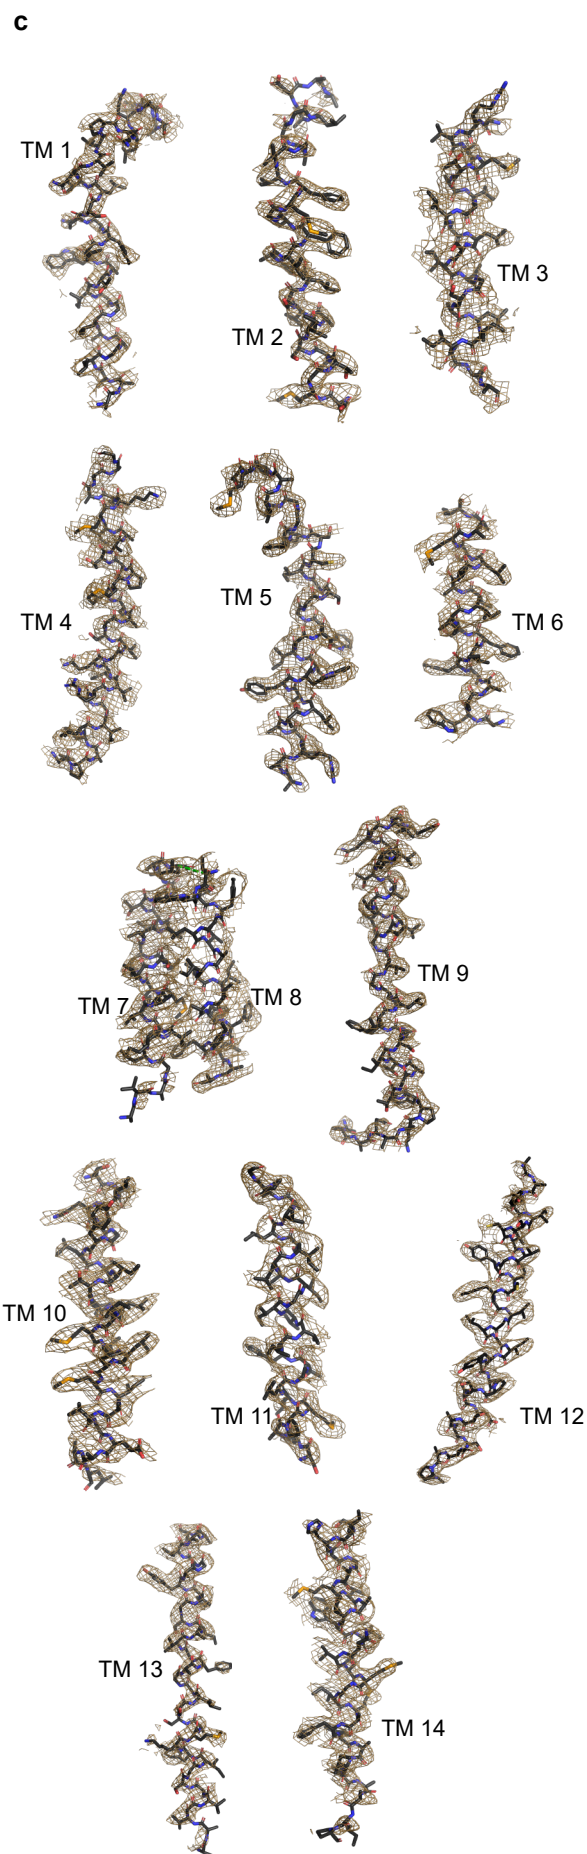

**Supplementary Figure S5** | **a.** (Top) signal quality represented by  $\Delta I_{\text{Ano}}/\sigma(\Delta I_{\text{Ano}})$ . Anomalous phasing and substructure determination was done at 5 Å; (bottom) 16 out of 17 Se atom positions were determined with their anomalous densities shown in golden spheres and meshes respectively. Zn<sup>2+</sup> is shown in pink sphere. **b.** ASU contains 2 molecules of NorC and Icab each, shown with 2Fo-Fc map contoured at 1.0  $\sigma$ ; focused region of interest displays interactions between Icab chains (stick representation). **c.** Individual TM helices and their surrounding 2Fo-Fc map at 1.0  $\sigma$  carved at 2.0 Å.

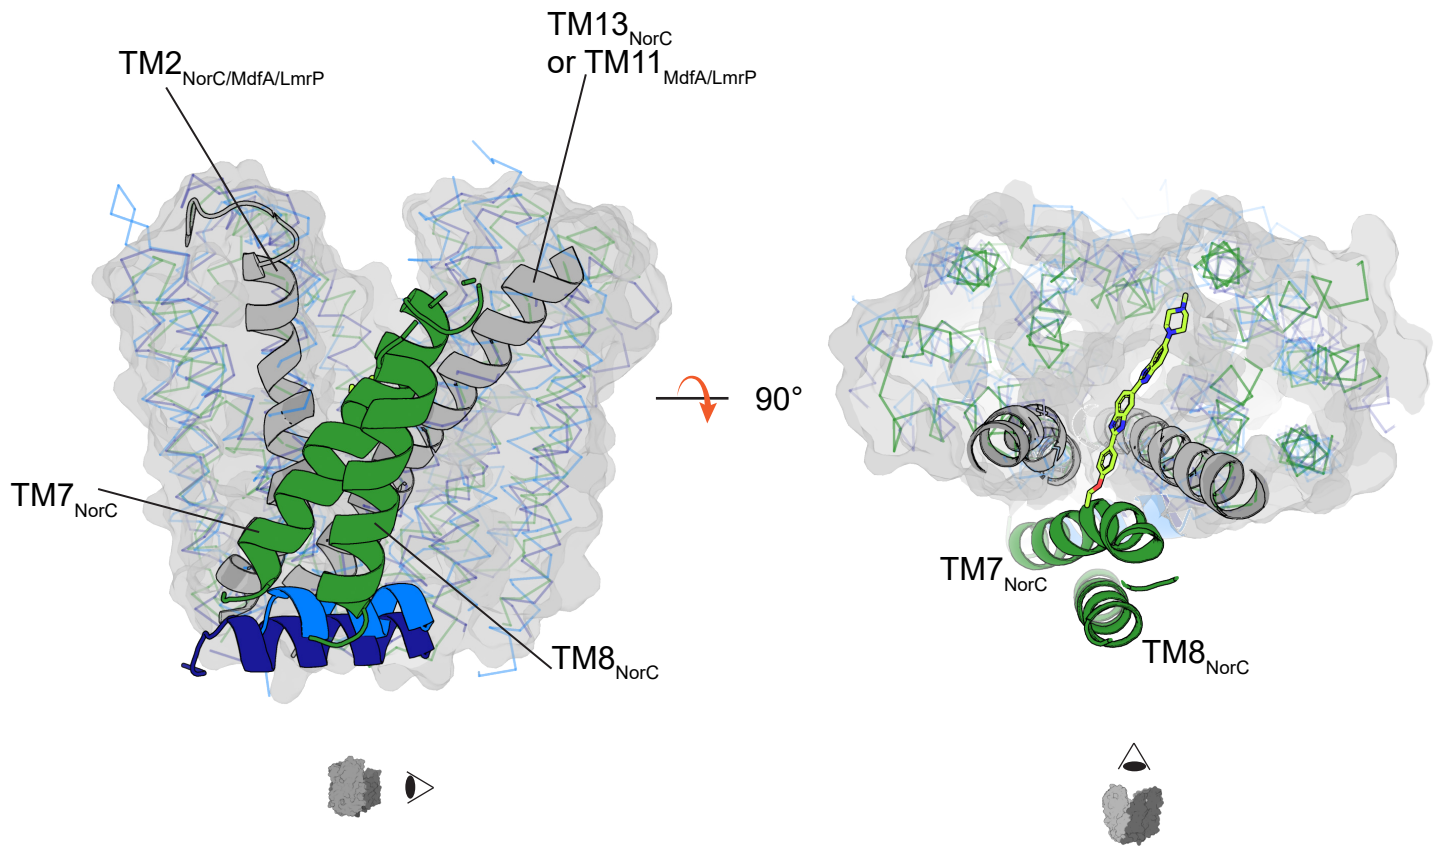

**Supplementary Figure S6** | Superposition of NorC (green), MdfA (PDB ID: 6GV1, dark blue), and LmrP (PDB ID: 6T1Z, light blue) structures (*left*). TMs 7 and 8 of NorC occlude a wide opening going from the vestibule to the upper half of the membrane, through a crevice made by TMs 2 and 13 (grey helices). Top view (*right*) showing the substrate Hoechst (sticks), bound to LmrP) clashing with TM7 of NorC.

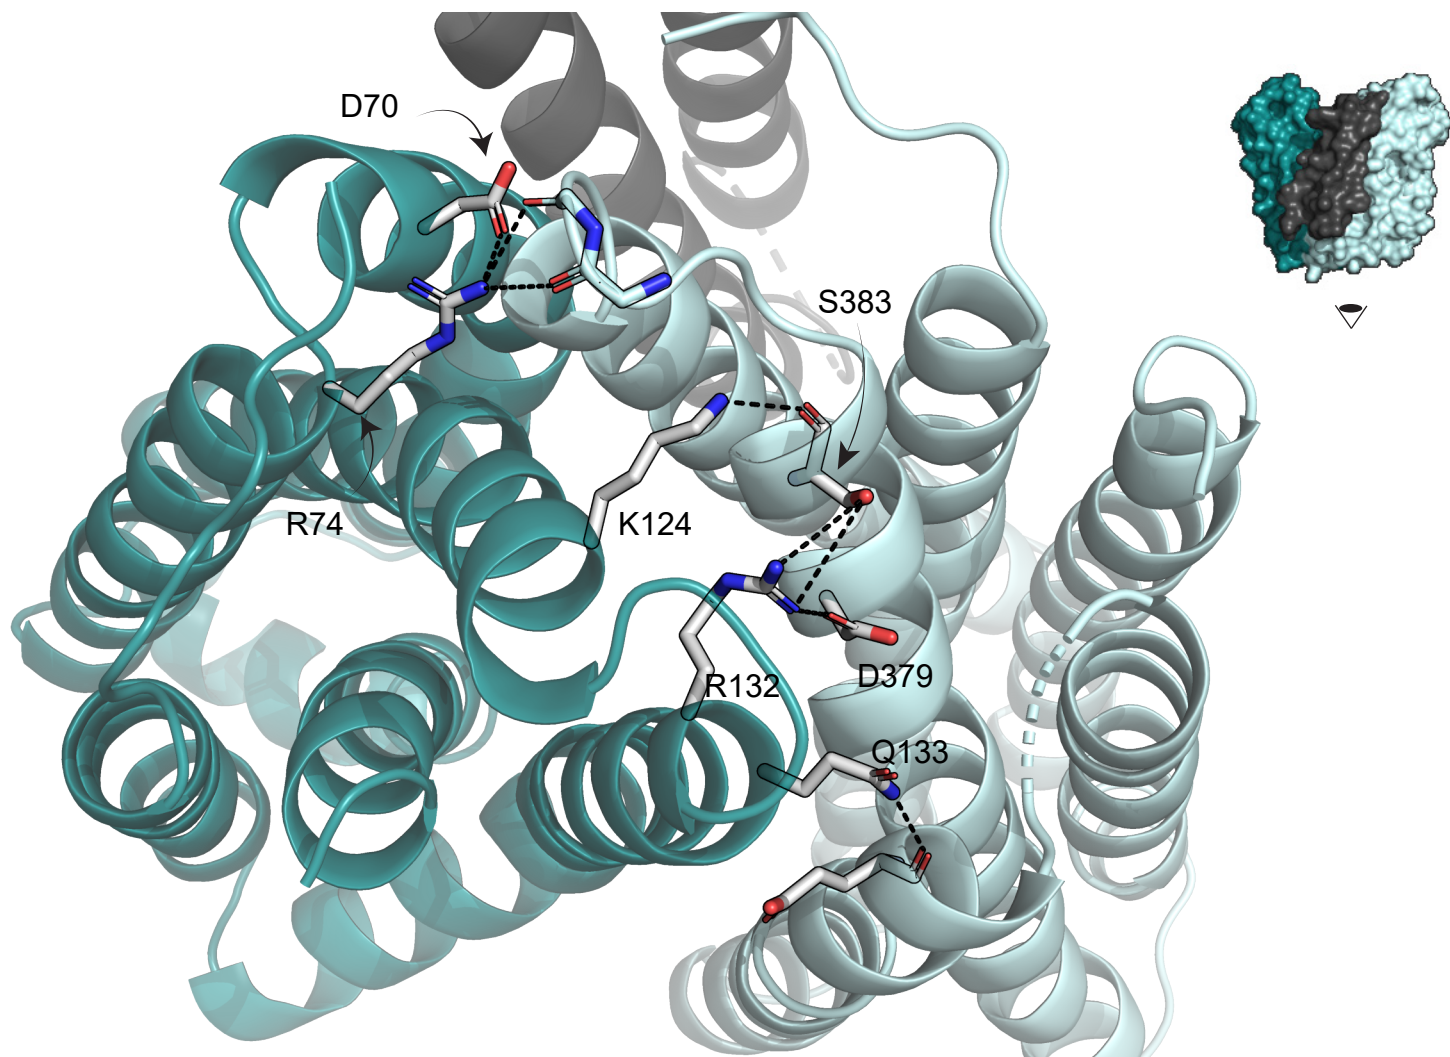

**Supplementary Figure S7** | Polar interactions between two symmetry-related halves of NorC (N-terminal in teal, C-terminal in pale cyan) towards the cytosolic side.



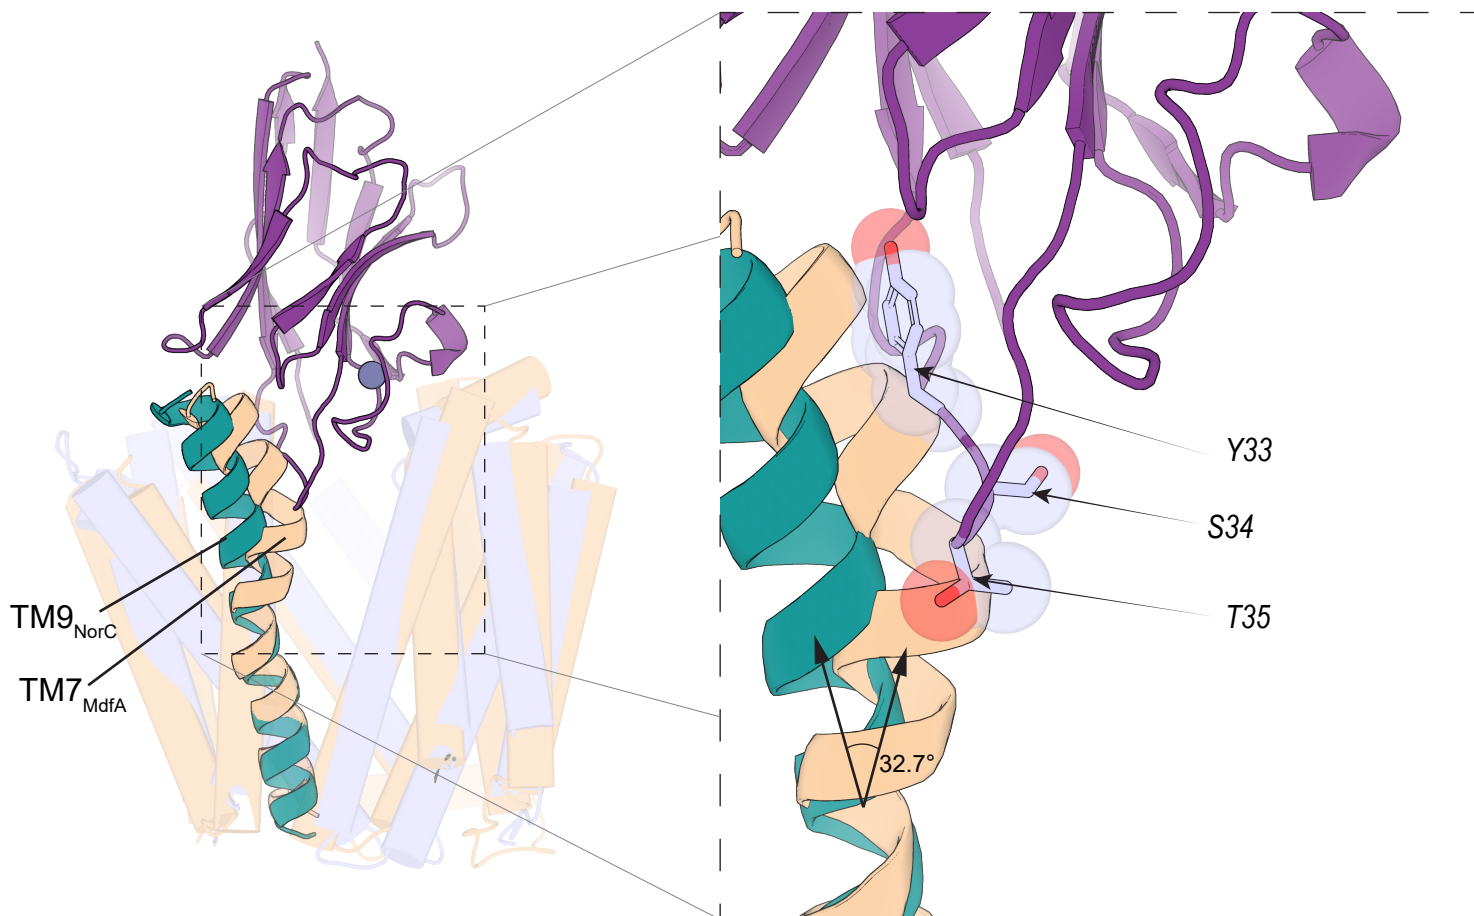

**Supplementary Figure S8** | Superposition of NorC-ICab (light blue and purple) complex and MdfA (PDB ID: 6GV1, yellow). TM7 of MdfA and TM9 of NorC are shown in cartoon representation; where TM9 of NorC (teal) is relatively unbent whereas TM7 of MdfA kinks to an angle of 32.7° (*enlarged view, right*). Side chains of ICab that would clash with TM7 of MdfA are shown in sticks and transparent spheres.

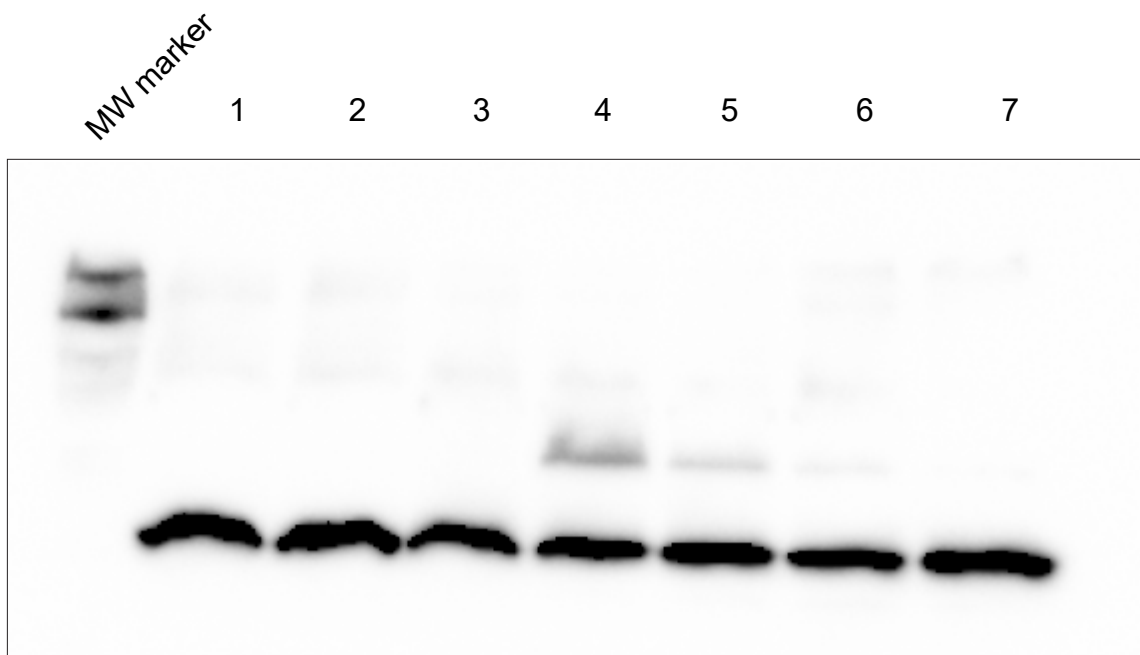

**Supplementary Figure S9** | Uncut western blot of PEG Maleimide accessibility assay shown in Figure 5b.

Samples loaded in the lanes shown above are described as follows:

1: Membranes with NorC WT overexpressed

2. Membranes with NorC WT overexpressed + 1mM PEG maleimide

3. Membranes with NorC T378C overexpressed

4. Membranes with NorC T378C overexpressed + 1mM PEG maleimide

5. Membranes with NorC T378C overexpressed + 1mM TPP<sup>+</sup> + 1mM PEG Maleimide

6. Membranes with NorC T378C overexpressed + 60  $\mu$ M ICab + 1mM PEG maleimide

7. Membranes with NorC T378C overexpressed + 1mM TPP<sup>+</sup> + 60  $\mu$ M ICab + 1mM PEG maleimide.

The darker bands in the molecular weight marker correspond to molecular masses of 75kDa and 100kDa.

|                                          | NorC WT vs ICab   | NorC WT vs ICab with 1mM TPP (in both cell and syringe) |
|------------------------------------------|-------------------|---------------------------------------------------------|
| <b>Model</b>                             | One set of sites  | One set of sites                                        |
| <b>[Cell] (<math>\mu\text{M}</math>)</b> | 20                | 20                                                      |
| <b>[Syr] (<math>\mu\text{M}</math>)</b>  | 200               | 200                                                     |
| <b>N (Sites)</b>                         | $1.04 \pm 0.005$  | $1.14 \pm 0.012$                                        |
| <b><math>K_d</math> (nM)</b>             | $46.6 \pm 8.90$   | $35.6 \pm 16.3$                                         |
| <b><math>\Delta H</math> (kcal/mol)</b>  | $-4.49 \pm 0.063$ | $-2.66 \pm 0.082$                                       |
| <b>Offset (kcal/mol)</b>                 | $0.119 \pm 0.04$  | $0.580 \pm 0.06$                                        |
| <b><math>\Delta G</math> (kcal/mol)</b>  | -10.0             | -10.2                                                   |

**Supplementary Table ST1** | Summary of ITC profiles shown in Figure 4c.
