# Supplementary material for: Structural basis of inhibition of a transporter from Staphylococcus aureus, NorC, through a single-domain camelid antibody
Source: PubMed Central journal article supplement (PMC8257674; doi:10.1038/s42003-021-02357-x), 2021-07-05
Supplement: 42003_2021_2357_MOESM3_ESM.pdf [file 42003_2021_2357_MOESM3_ESM.pdf]

## **Description of Additional Supplementary Files**

**File name:** Supplementary Movie SM1

**Description:** Conformational shifts in the CDRs of ICab upon interacting with NorC.

**File name:** Supplementary Data 1

**Description:** All raw data used to make the figures are provided in a single .xlsx file. The sheets have been renamed with the figure/supplementary figure panel it represents, and respective captions are provided there.
